# Supplementary material for: Deletion of the Unfolded Protein Response Transducer IRE1α Is Detrimental to Aging Photoreceptors and to ER Stress-Mediated Retinal Degeneration
Source: PubMed Central journal article supplement — Invest Ophthalmol Vis Sci. 2023 Apr 25;64(4):30. doi: 10.1167/iovs.64.4.30 (PMC10148664; doi:10.1167/iovs.64.4.30), 2023-04-25
Supplement: iovs-64-4-30_s001.pdf [file iovs-64-4-30_s001.pdf]

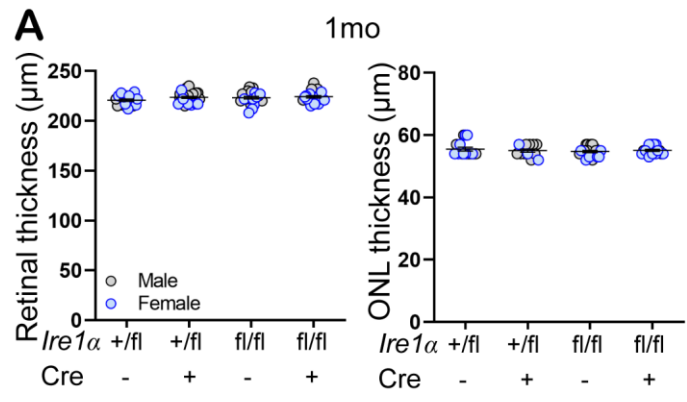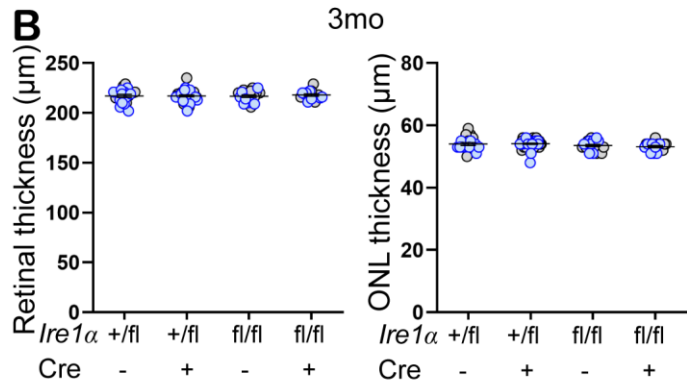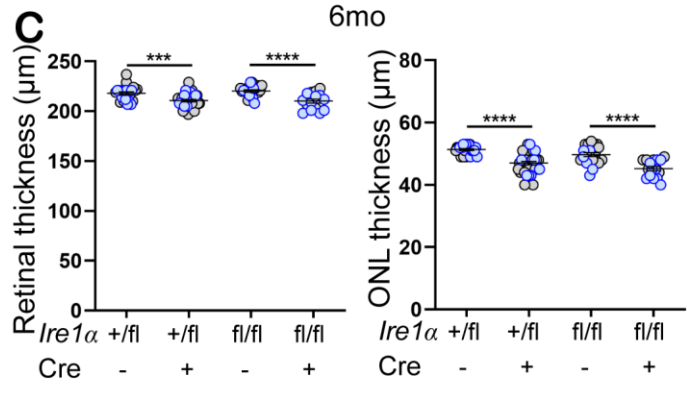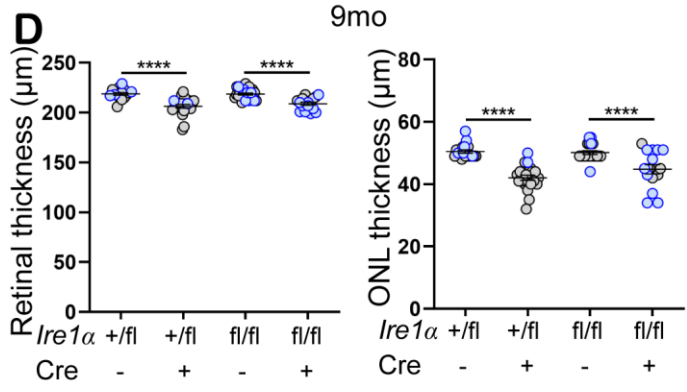

**Fig. S1: IRE1 $\alpha$  deficiency in rod photoreceptors induces age-related retinal degeneration.** (A-D) OCT measurements showing retinal and ONL thickness of IRE1 $\alpha$  deficient retinas at 1, 3, 6 and 9 months old, respectively showing no sex influence at any analyzed time point. Data are presented as mean  $\pm$  SEM. \*\*\* $p < 0.001$ , \*\*\*\* $p < 0.0001$ ; two-tailed Student's t-test.

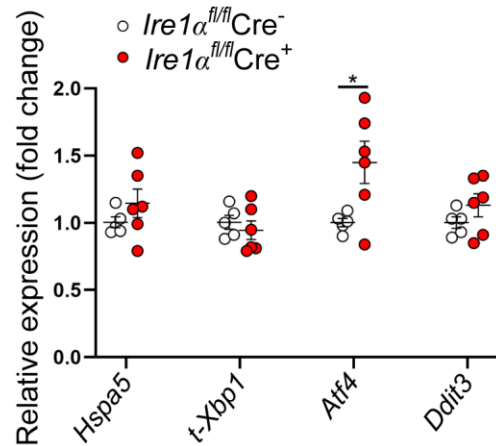

**Fig. S2: PERK pathway is increased in IRE1 $\alpha$  deficient retinas.** qPCR data from 1 month old IRE1 $\alpha$  deficient retinas showing an increase in the expression of *Atf4* that is downstream of PERK while *Ddit3*, *Hspa5* and *Xbp1* remain unchanged (n=5-6). Data are presented as mean  $\pm$  SEM. \* $p < 0.05$ ; two-tailed Student's t-test.

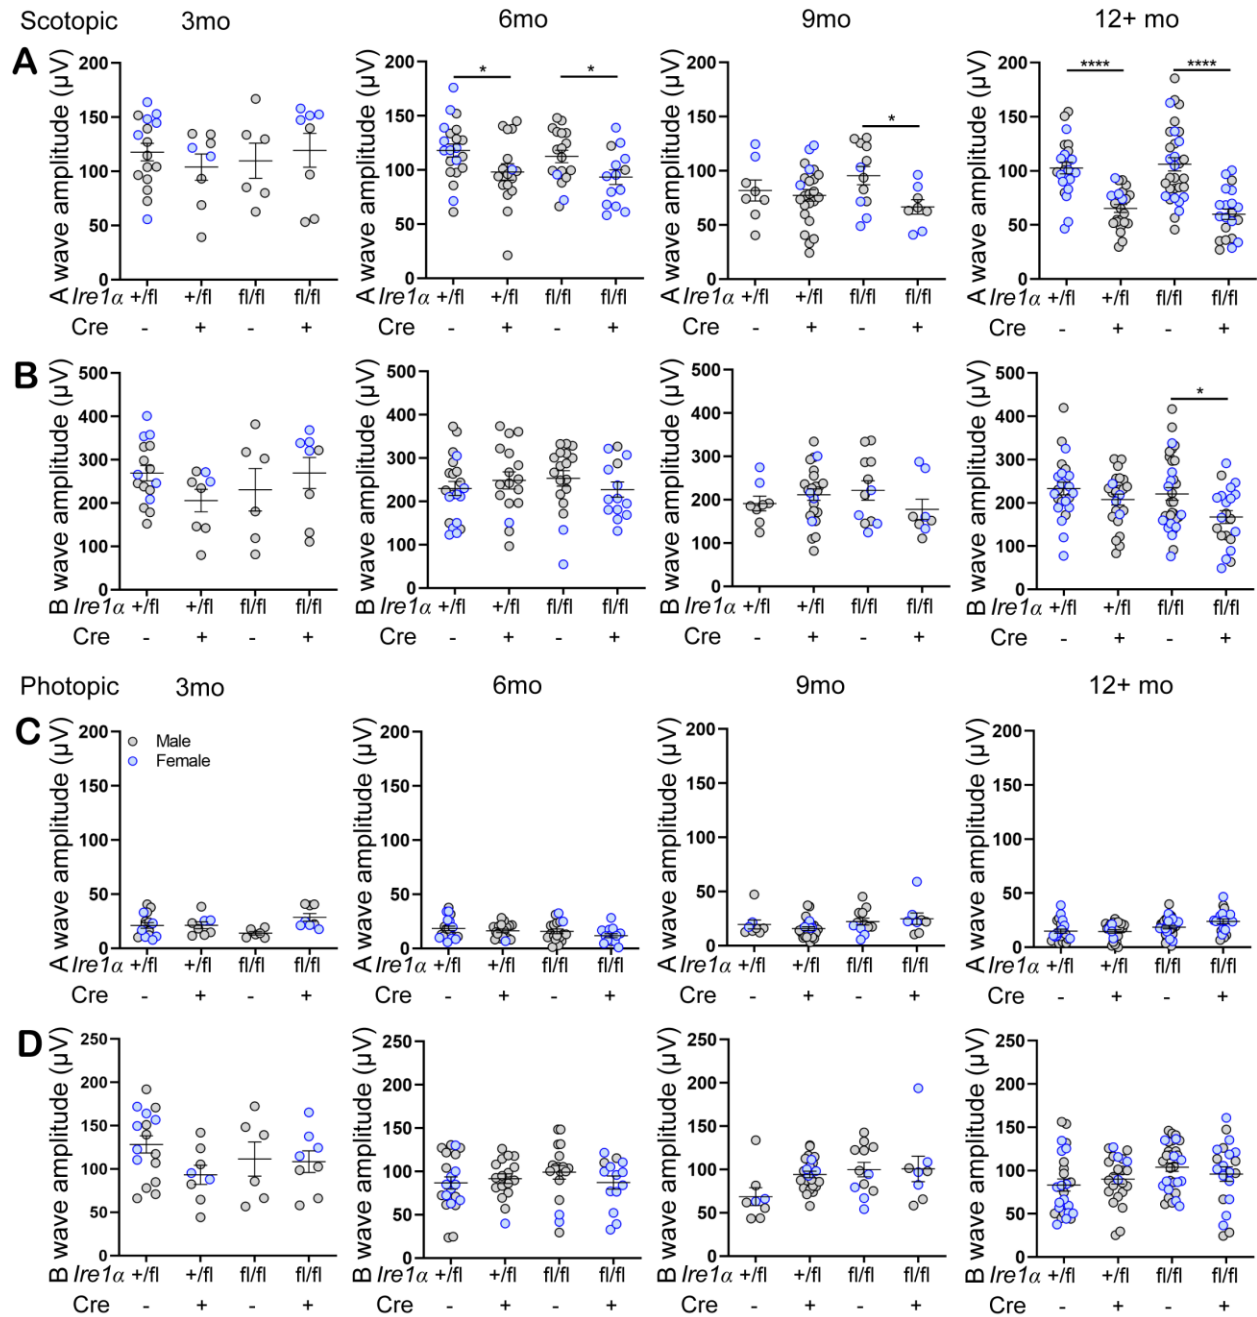

**Fig. S3: IRE1 $\alpha$  deficiency in rod photoreceptors causes retinal functional deficits.** (A and B) are scotopic and (C and D) are photopic ERGs recordings at 3, 6 and 9 months old represented by sex and showing a similar distribution between males and females at every recorded time point. Data are presented as mean  $\pm$  SEM. \* $p < 0.05$ , \*\*\*\* $p < 0.0001$ ; two-tailed Student's t-test.

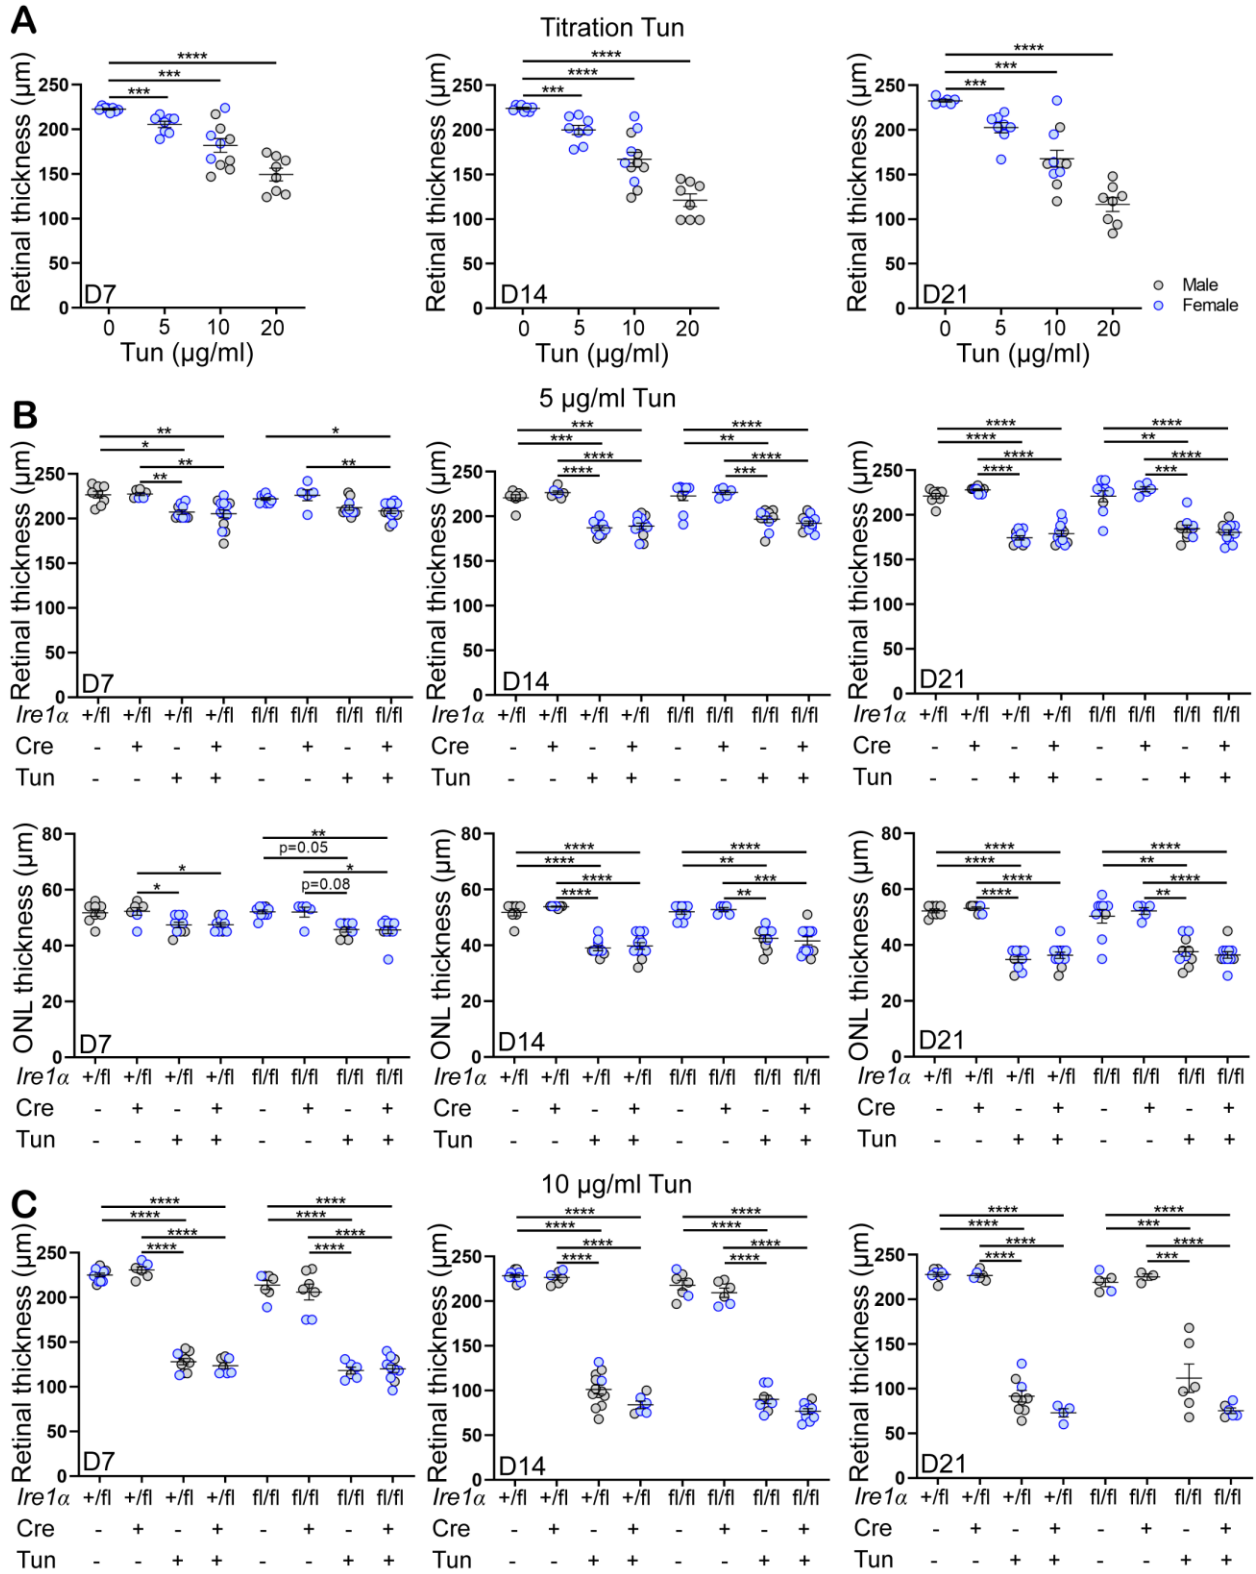

**Fig. S4: Sex does not influence retinal thickness in response to chemically induced ER stress.** OCT measurements of retinal and ONL thickness following intravitreal injection of tunicamycin. The data indicate that tunicamycin-induced retinal degeneration affects males and

females similarly for both the wild type (**A**) and IRE1 $\alpha$  deficient retinas (**B** and **C**). Data are presented as mean  $\pm$  SEM. \*p < 0.05, \*\*p < 0.01, \*\*\*p < 0.001, \*\*\*\*p < 0.0001; two-tailed Student's t-test for wild type mice and two-way ANOVA for IRE1 $\alpha$  deficient retinas. Tun, tunicamycin.

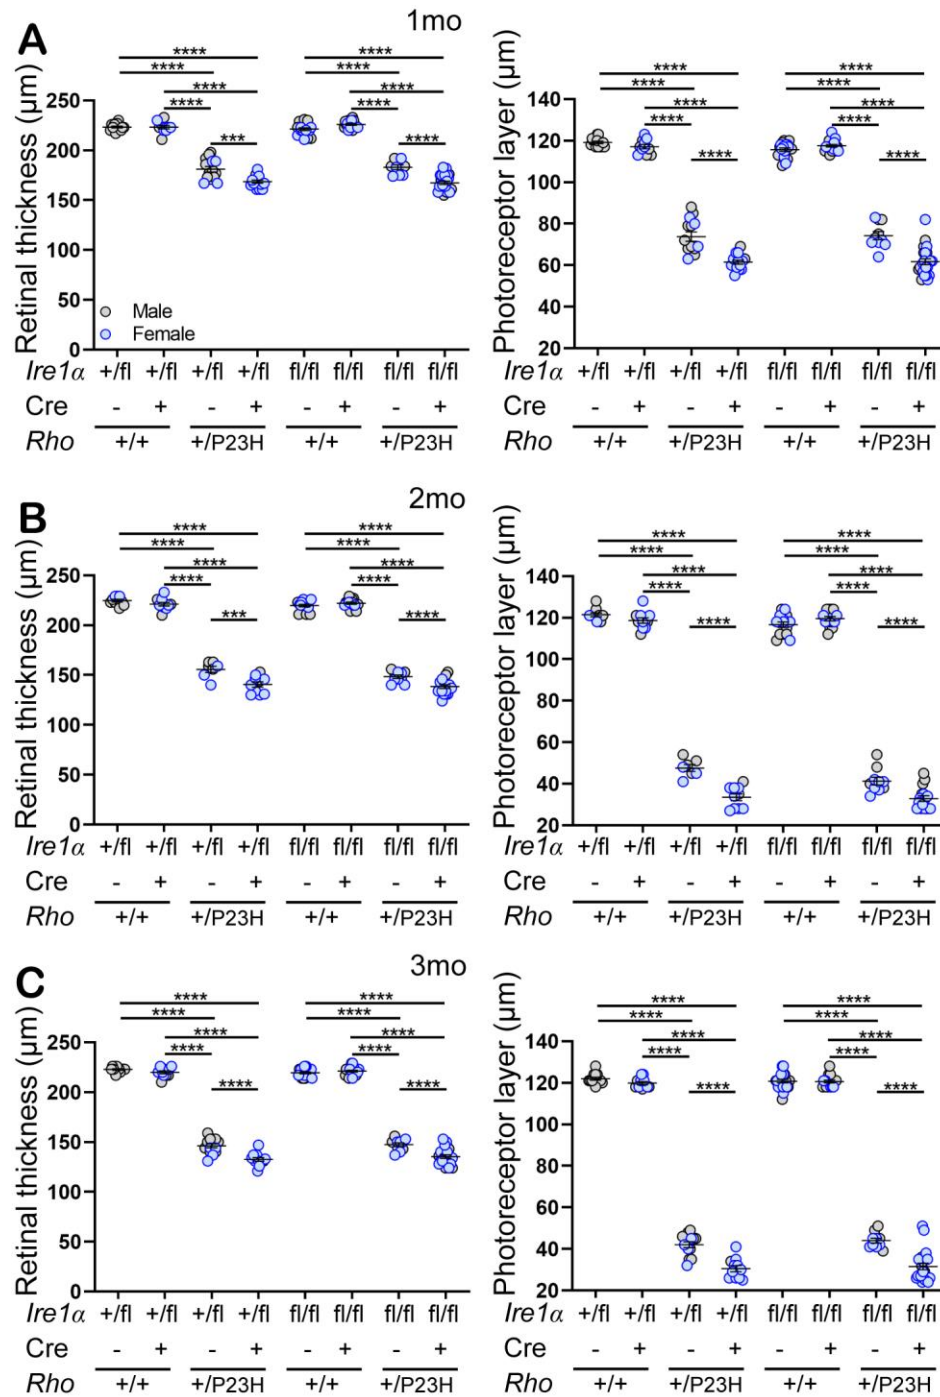

**Fig. S5: Inactivation of *Ire1 $\alpha$*  in rod photoreceptors affects similarly the males and females in retinal degeneration caused by *Rho*<sup>P23H</sup> mutation. (A-C) OCT data of IRE1 $\alpha$  deficient mice in *Rho*<sup>+P23H</sup> or *Rho*<sup>+/+</sup> background at 1, 2, and 3 months old respectively, showing a similar variation of retinal and photoreceptor layer thickness between males and females. Data are presented as mean  $\pm$  SEM. \*\*\*p < 0.001, \*\*\*\*p < 0.0001; two-way ANOVA.**

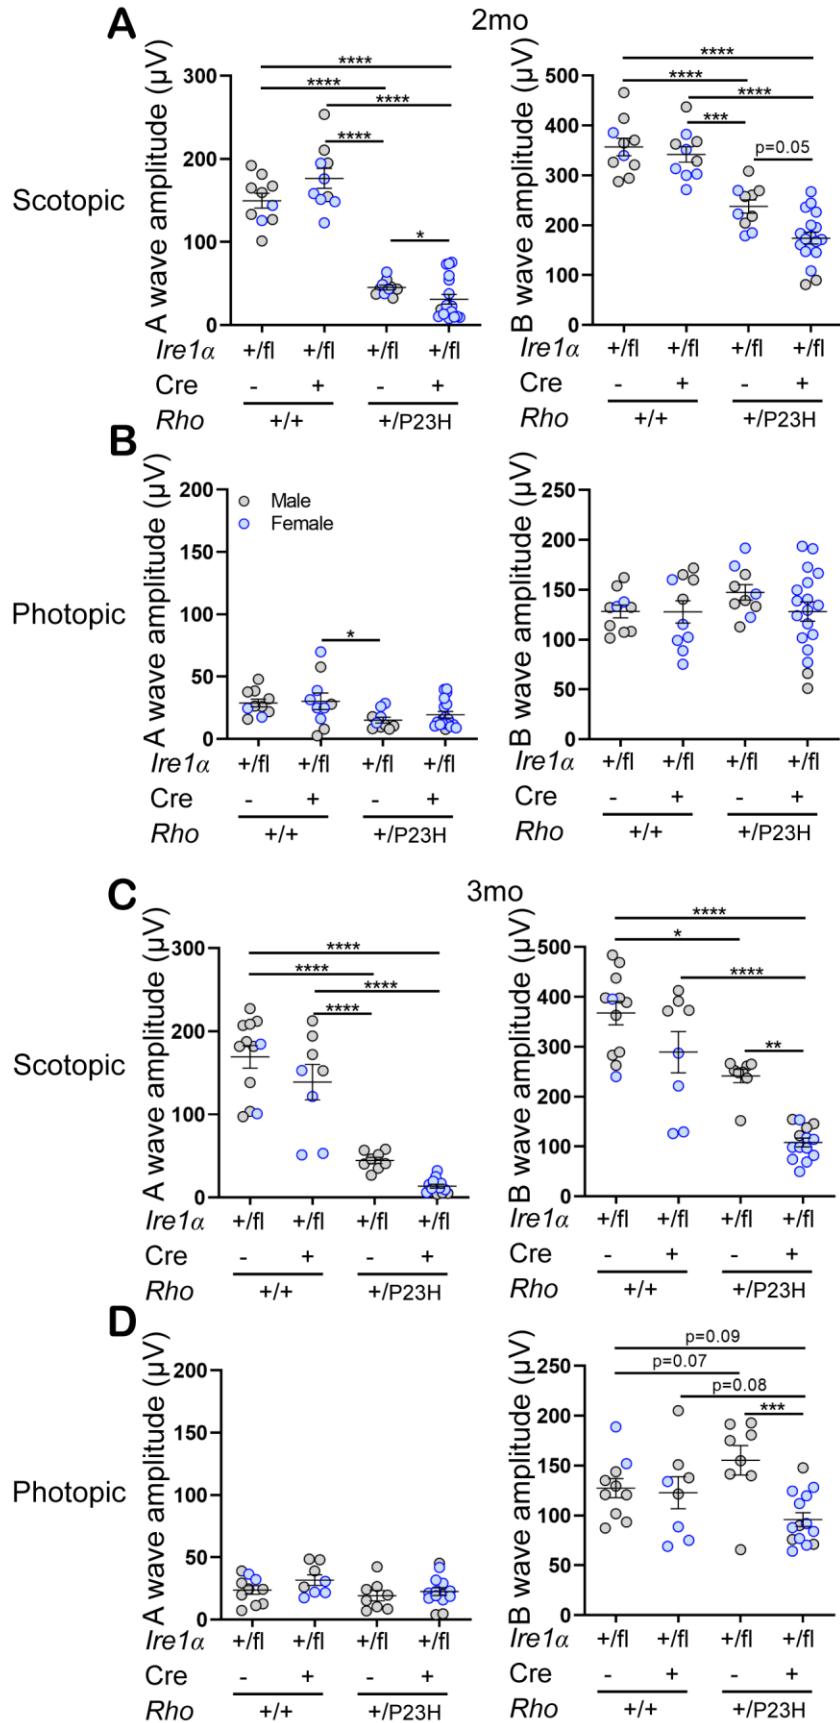

**Fig. S6: IRE1 $\alpha$  deficiency in rod photoreceptors tends to exacerbate retinal functional deficits caused by *Rho*<sup>P23H</sup> mutation and affects similarly males and females. (A and C) are scotopic ERGs recordings at 2, and 3 months respectively, showing decreased A wave and B wave responses of the *Rho*<sup>P23H</sup> retinas that tends to be exacerbated by IRE1 $\alpha$  deficiency. (B and D) are photopic ERGs recordings at 2 and 3 months, respectively, that show no significant alteration with the exception of a small decrease in some of the B wave amplitudes (for A and B, n=10-18; for C and D, n=8-14). Similar distribution was observed between males and females. Data are presented as mean  $\pm$  SEM. \*p < 0.05, \*\*p < 0.01 \*\*\*p < 0.001, \*\*\*\*p < 0.0001; two-way ANOVA.**
